# Supplementary material for: A cellulose nanofiber–polyacrylamide hydrogel based on a co-electrolyte system for solid-state zinc ion batteries to operate at extremely cold temperatures
Source: Royal Society of Chemistry journal article supplement (doi:10.1039/d1ta08023g), 2021-01-01
Supplement: d1ta08023g1.pdf [file d1ta08023g1.pdf]

## Supporting Information

### Hybrid Methanol and Water Co-solvent Electrolyte for Zinc Ion Batteries to Operate at Extremely Cold Temperatures

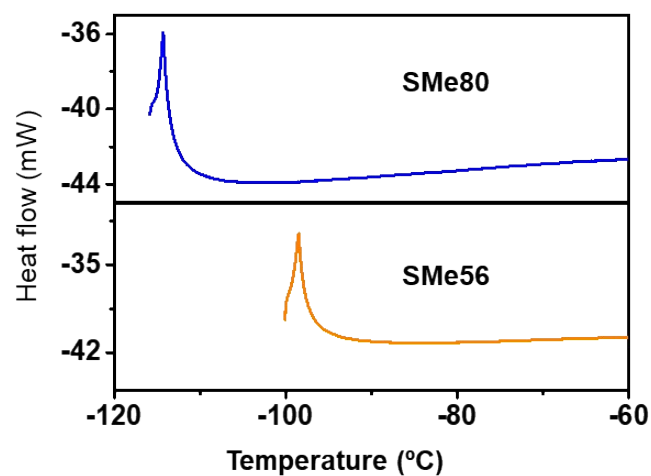

Figure S1. DSC curves of hybrid electrolytes

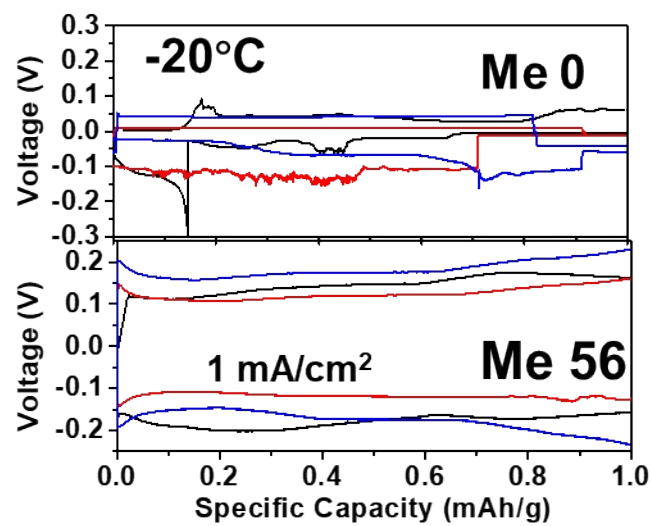

**Figure S2.** Voltage profiles for Zn//Zn symmetric batteries at -20 °C.

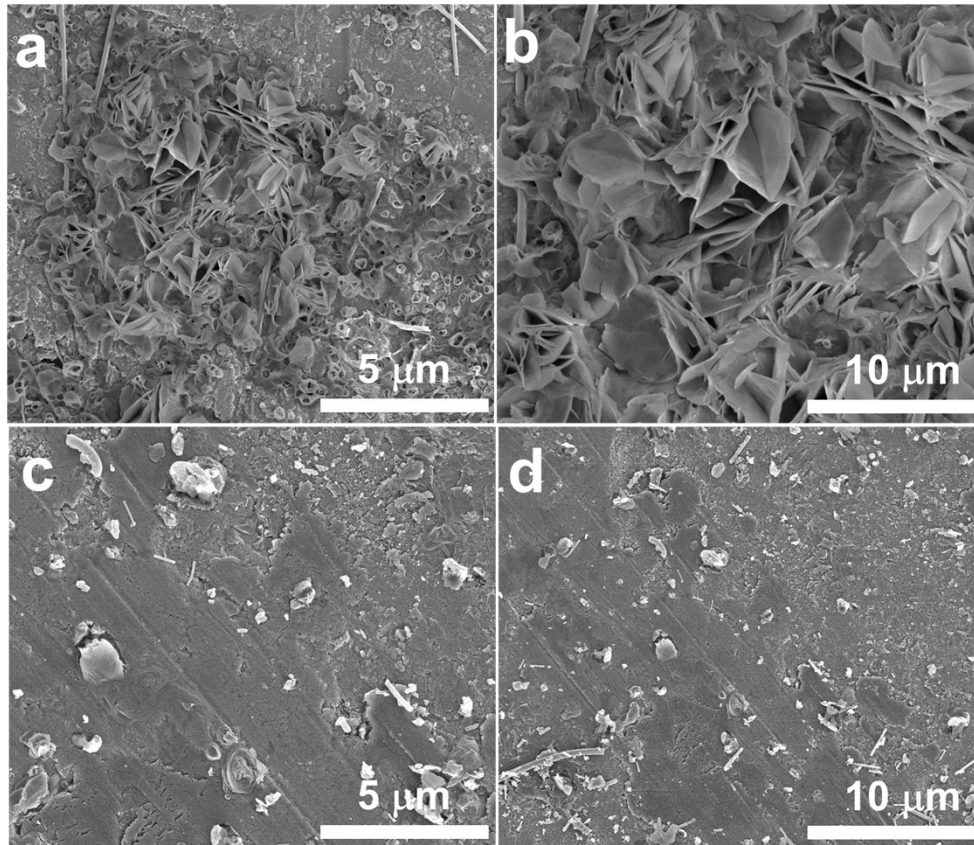

**Figure S3.** SEM images of Zn deposition with a capacity of 1 mAh/cm<sup>2</sup> after 50 cycles through Zn//Zn symmetric cells with (a, b) Me0 and (c, d) Me56 electrolyte.

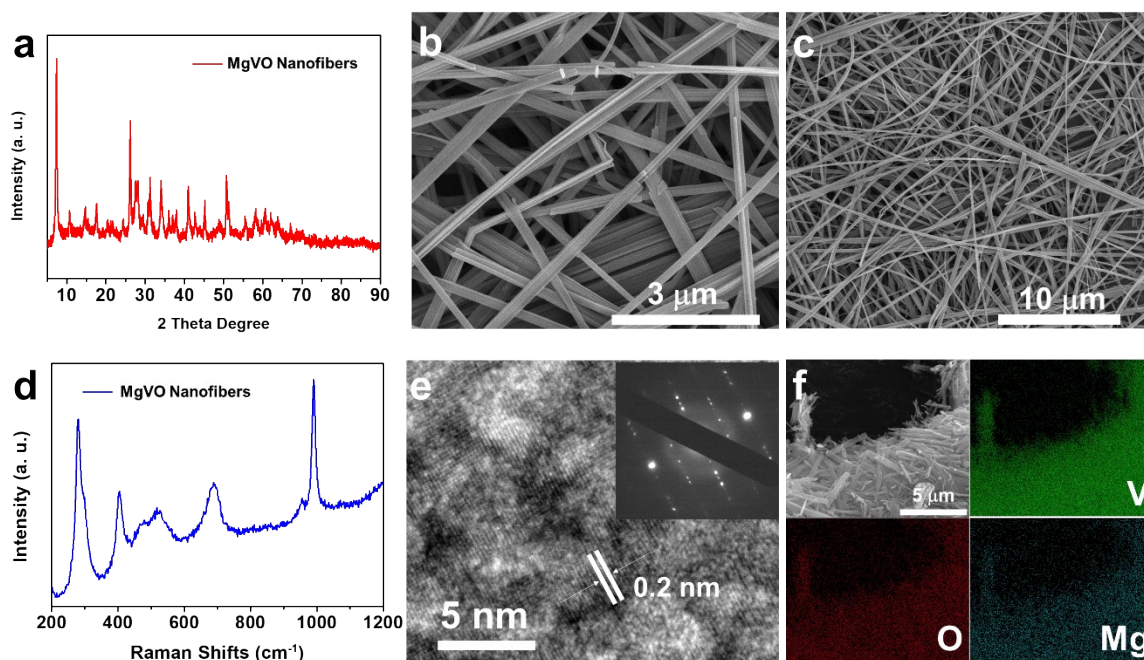

**Figure S4.** Material characterization of MgVO nanofibers. (a) XRD pattern, (b, c) SEM images, (d) Raman spectrum, (e) HRTEM images and corresponding SAED pattern, (f) EDS elemental mapping

The XRD pattern of  $\text{Mg}_{0.3}\text{V}_2\text{O}_5 \cdot 1.0\text{H}_2\text{O}$  nanofibers exhibits several sharp diffraction peaks. The dominant peak at  $7.3^\circ$  corresponds to the (001) plane, showing a high preferred orientation along c-axis. The SEM images in Figure S3b and c confirm the nanobelt morphology with the width of 100-300 nm and length of 10-50  $\mu\text{m}$ . The Raman spectrum data in Figure S3d show the peaks at 992.3, 690, 517.5, 404.3, 274  $\text{cm}^{-1}$ . The peaks at 992.3, 690 and 517.5  $\text{cm}^{-1}$  correspond to the stretching vibration of the V-O bonds. The characteristic stretching mode at 992.3  $\text{cm}^{-1}$  reveals the layer-type crystal structure of synthesized  $\text{Mg}_{0.3}\text{V}_2\text{O}_5 \cdot 1.0\text{H}_2\text{O}$ . Figure S3e shows the high-resolution TEM images and SAED pattern of MgVO nanofibers. The spot pattern confirms the single-crystal nature of the prepared MgVO nanofibers. EDS mapping in Figure 3f confirms the elemental composition. The vanadium, magnesium, and oxygen signals were overlapped uniformly across the entire sample.

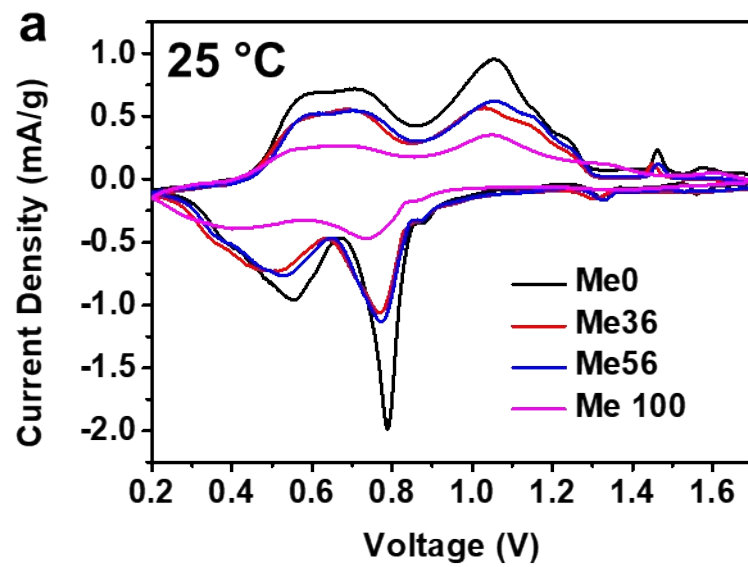

**Figure S5.** (a) CV curves of MgVO/Zn batteries with different hybrid electrolytes at 25 °C.

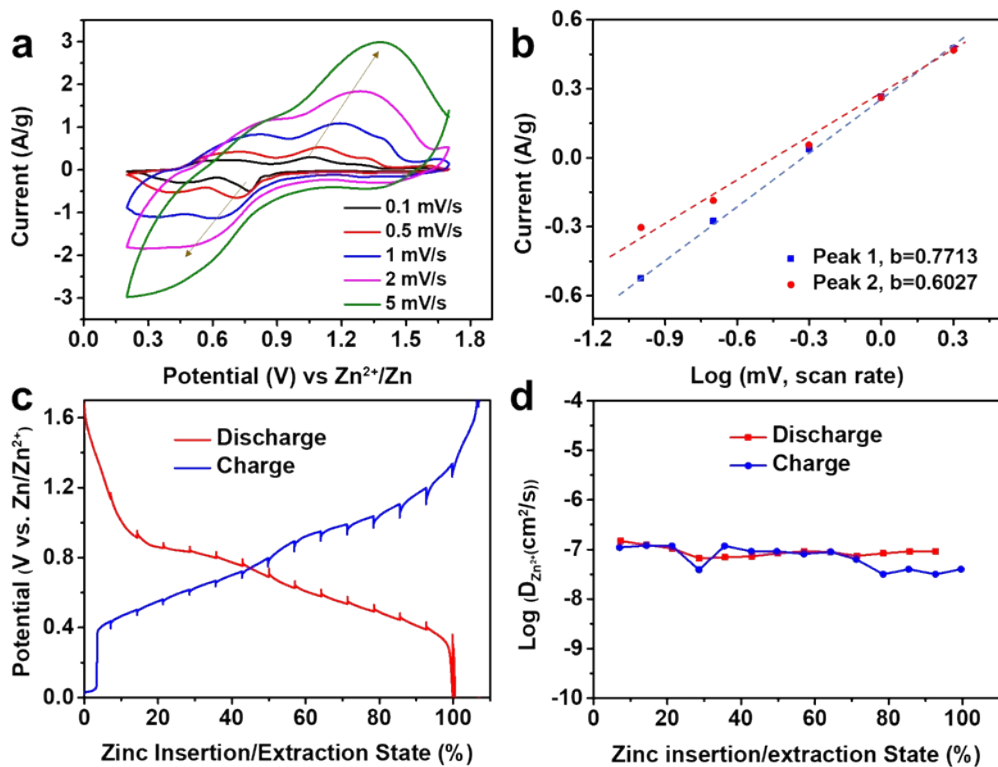

**Figure S6.** (a) CV curves at the scan rates of 0.1, 0.5, 1, 2 and 5 mV/s, (b) Randles-Sevcik plot of cathodic and anodic peaks, (c) GITT profiles of ZIBs with the Me56 electrolyte and (d) diffusion versus different  $Zn^{2+}$  insertion/extraction states

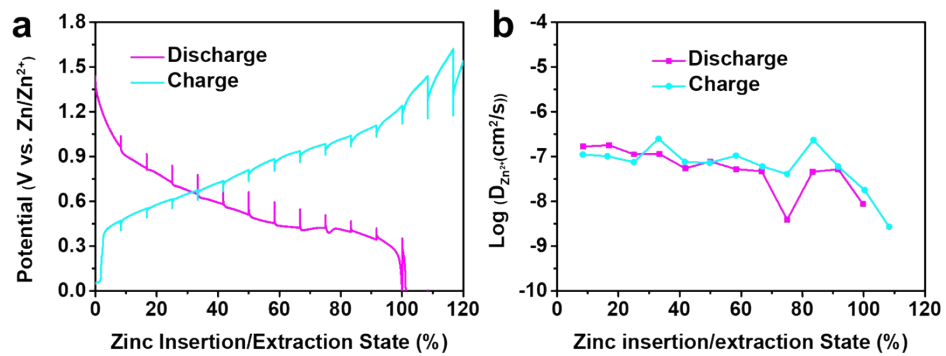

**Figure S7.** (a) GITT profiles of ZIBs with Me100 electrolyte, (b) diffusion versus different Zn<sup>2+</sup> insertion/extraction states.

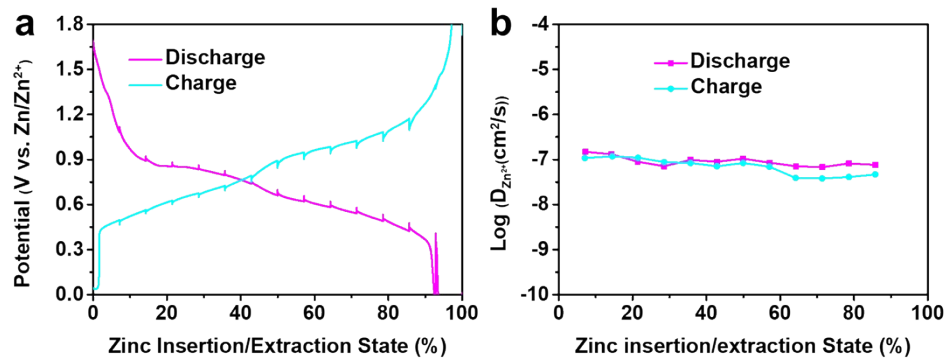

**Figure S8.** (a) GITT profiles of ZIBs with Me0 electrolyte, (b) diffusion versus different Zn<sup>2+</sup> insertion/extraction states.



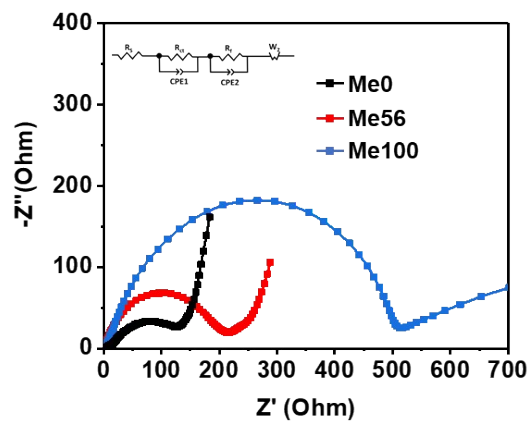

**Figure S9.** EIS spectra of the batteries at different electrolyte

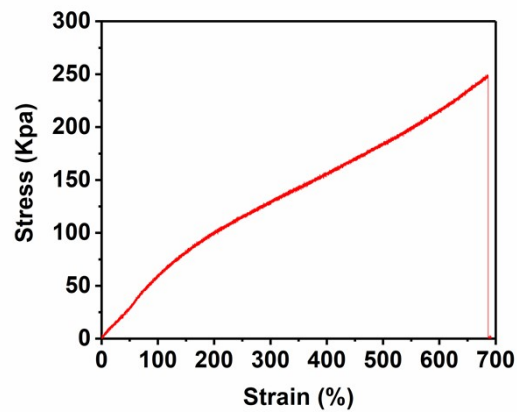

**Figure S10.** Stress-strain curves of CNF-PAM hydrogel electrolyte.

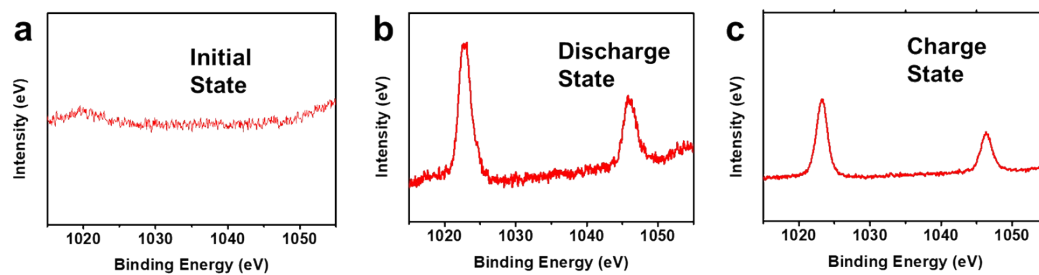

**Figure S11.** High-resolution XPS spectrum of Zn 2p at (a) initial, (b) discharge and (c) charge states.

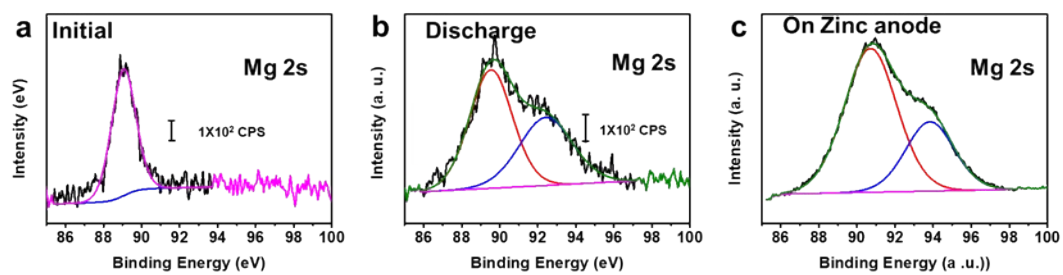

**Figure S12.** High-resolution XPS spectrum of Mg 2s at (a) initial, (b) 1<sup>st</sup> charge states and (c) Mg 2s on zinc anode electrode after 800 cycles.
